# Supplementary material for: A novel reversible colorimetric chemosensor for the detection of Cu2+ based on a water-soluble polymer containing rhodamine receptor pendants
Source: Royal Society of Chemistry journal article supplement (doi:10.1039/c5ra00745c), 2015-01-01
Supplement: c5ra00745c1.pdf [file c5ra00745c1.pdf]

## Supporting Information

### **A novel reversible colorimetric chemosensor for the detection of Cu<sup>2+</sup> based on water-soluble polymer containing rhodamine receptor pendants**

**Guang Li,<sup>\*a</sup> Farong Tao,<sup>a</sup> Hu Wang,<sup>b</sup> Liping Wang,<sup>a</sup> Jiaojiao Zhang,<sup>a</sup> Peipei Ge,<sup>a</sup> Lin Liu,<sup>a</sup> Yunhua Tong<sup>a</sup> and Su Sun<sup>a</sup>**

*<sup>a</sup> School of Materials Science and Engineering, Liaocheng University, Liaocheng 252059, China. Fax: +86 635 8230831; Tel: +86 635 8230919; E-mail: lglzsd@126.com*

*<sup>b</sup> Center of Analysis and Testing of China National Metrology Accredited Laboratory, Anhui University, Hefei 230039, China*

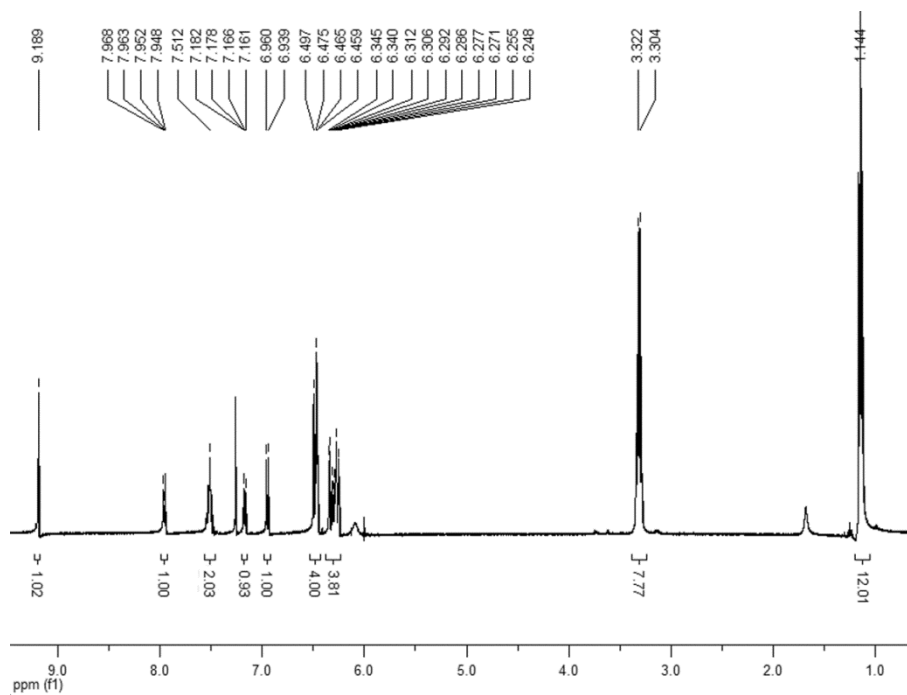

**Fig. S1**  $^1\text{H}$  NMR spectrum of RhBHB in  $\text{CDCl}_3$ .

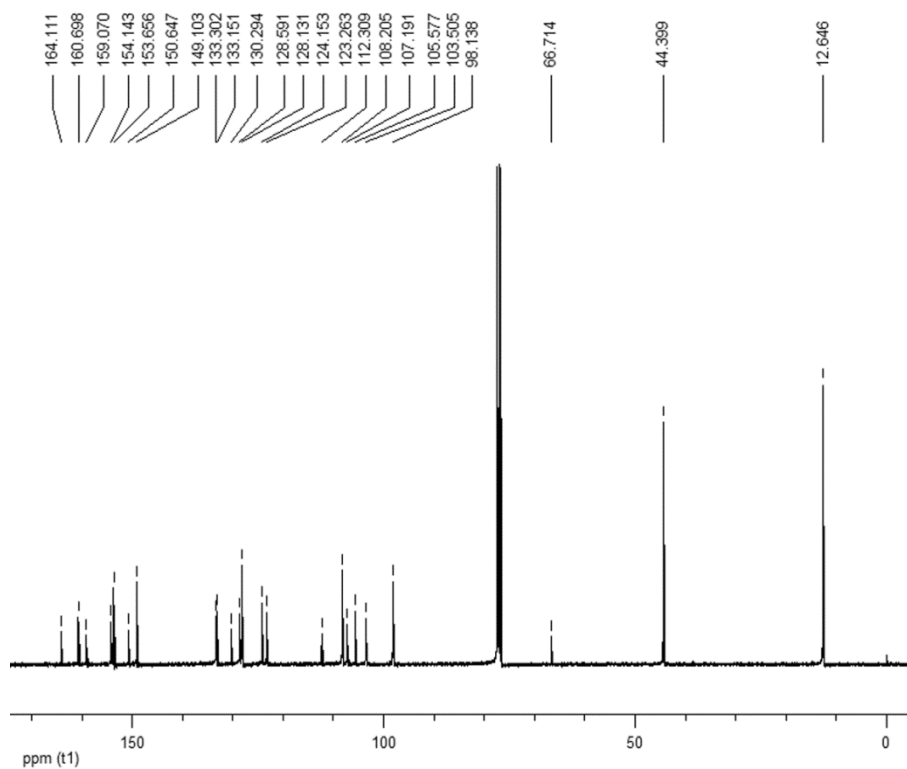

**Fig. S2**  $^{13}\text{C}$  NMR spectrum of RhBHB in  $\text{CDCl}_3$ .

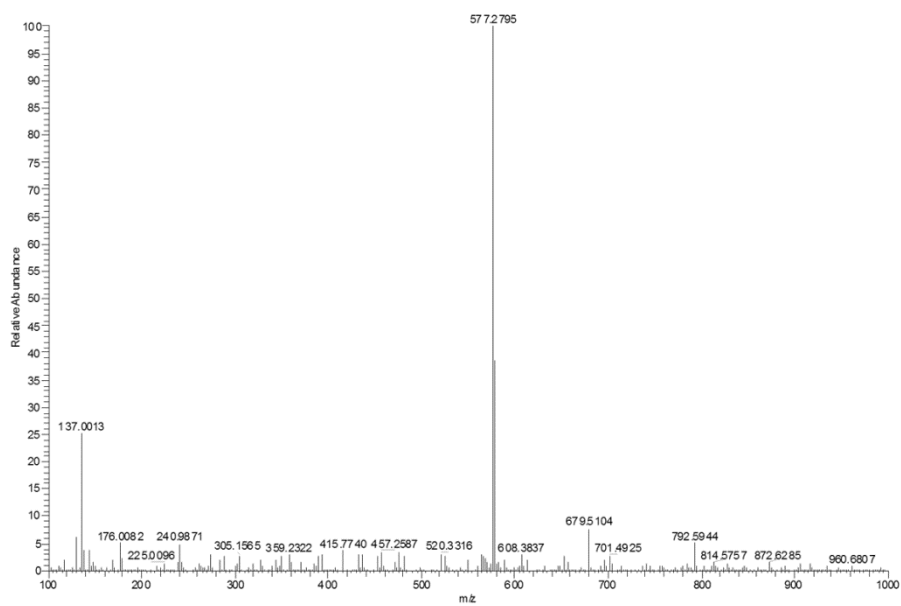

**Fig. S3** HRMS of RhBHB.

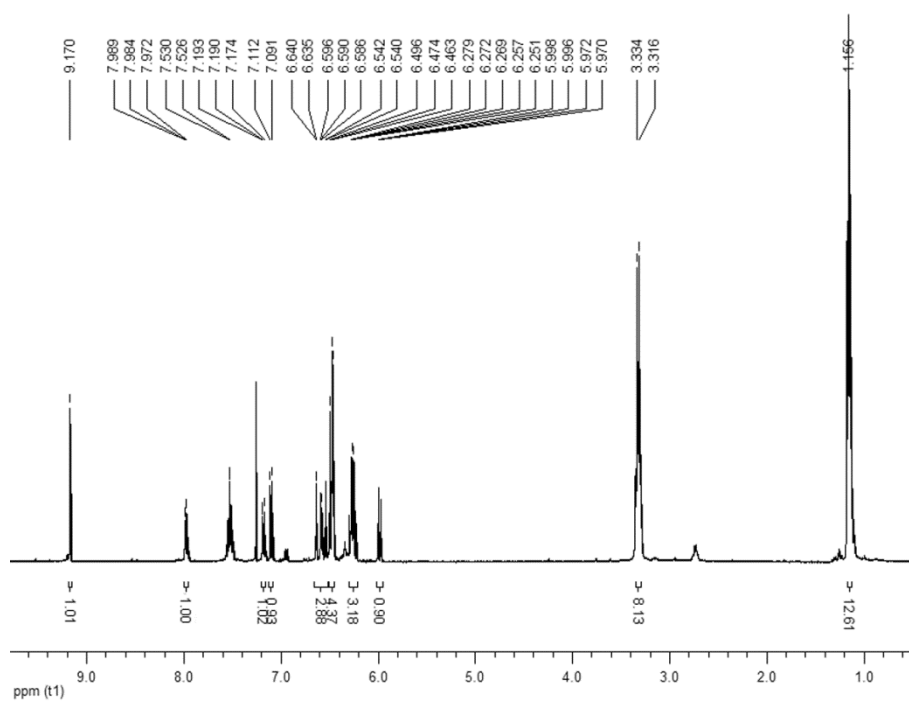

**Fig. S4** <sup>1</sup>H NMR spectrum of RhBBA in CDCl<sub>3</sub>.

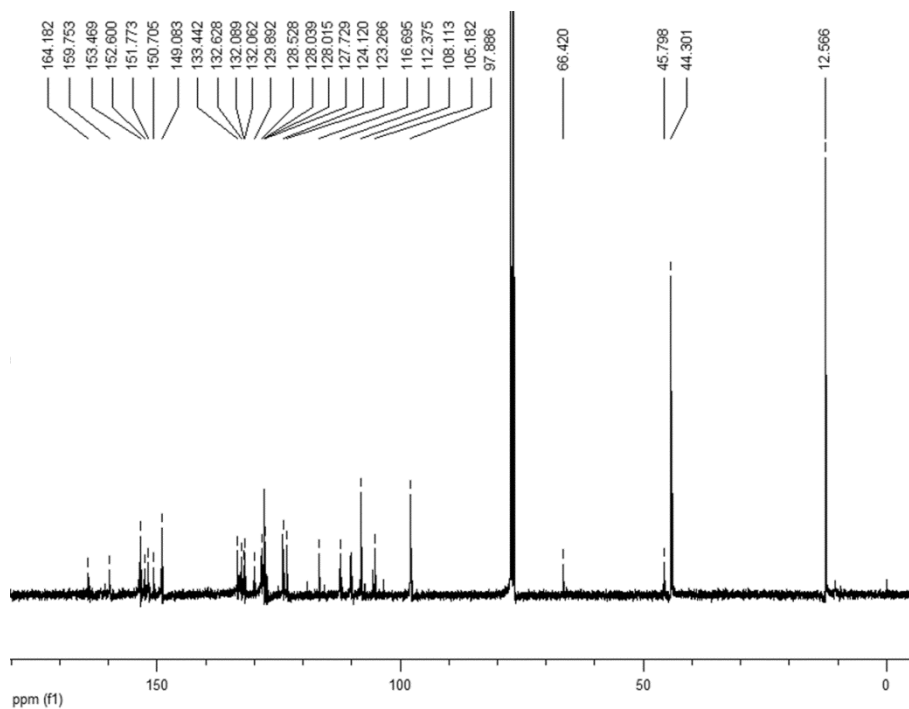

**Fig. S5**  $^{13}\text{C}$  NMR spectrum of RhBBA in  $\text{CDCl}_3$ .

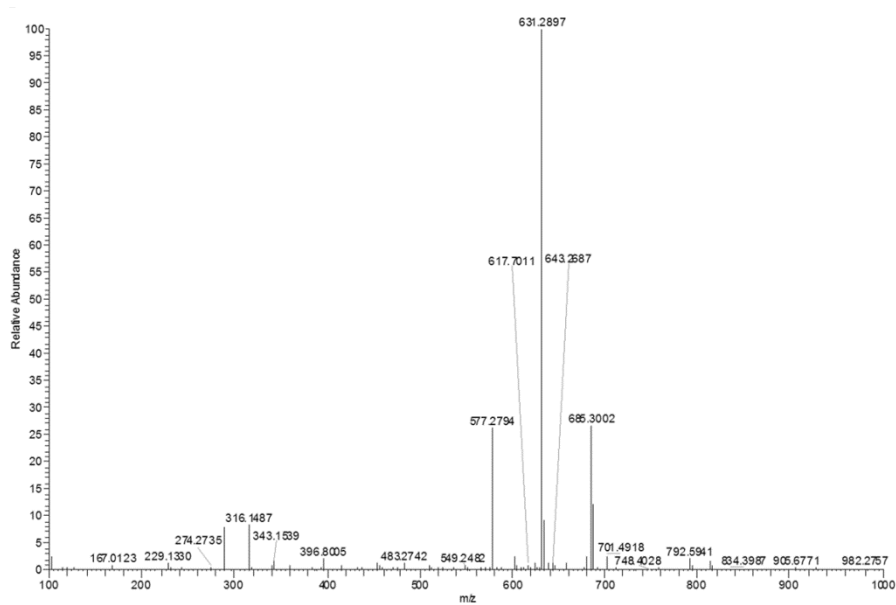

**Fig. S6** HRMS of RhBBA.

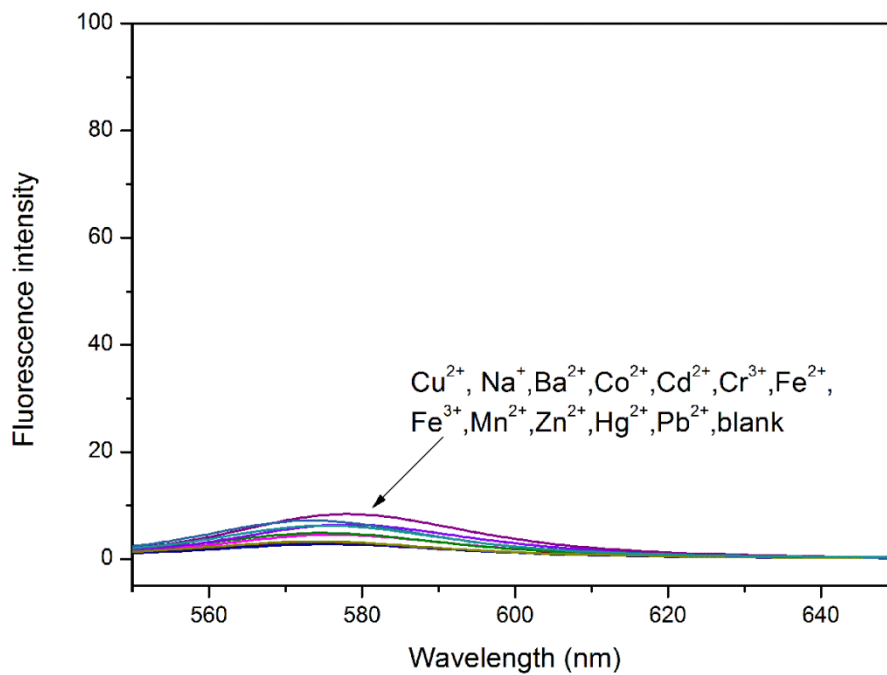

**Fig. S7** Fluorescence spectra of P(HEA-co-RhBBA) in aqueous solution (10  $\mu\text{M}$  RhBBA) upon addition of 5 equiv. of various metal ions. (Ex. 520 nm)

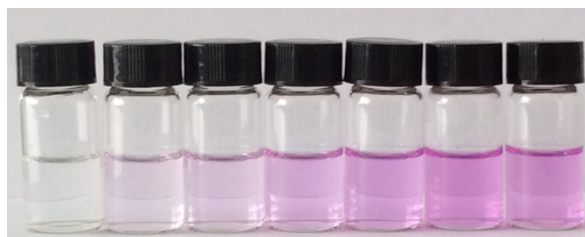

**Fig. S8** Color changes of P(HEA-co-RhBBA) in aqueous solution upon addition of varying quantities of  $\text{Cu}^{2+}$  ions (from left to right: 0, 0.05, 0.1, 0.25, 0.5, 1.0, 2.0 equiv.).

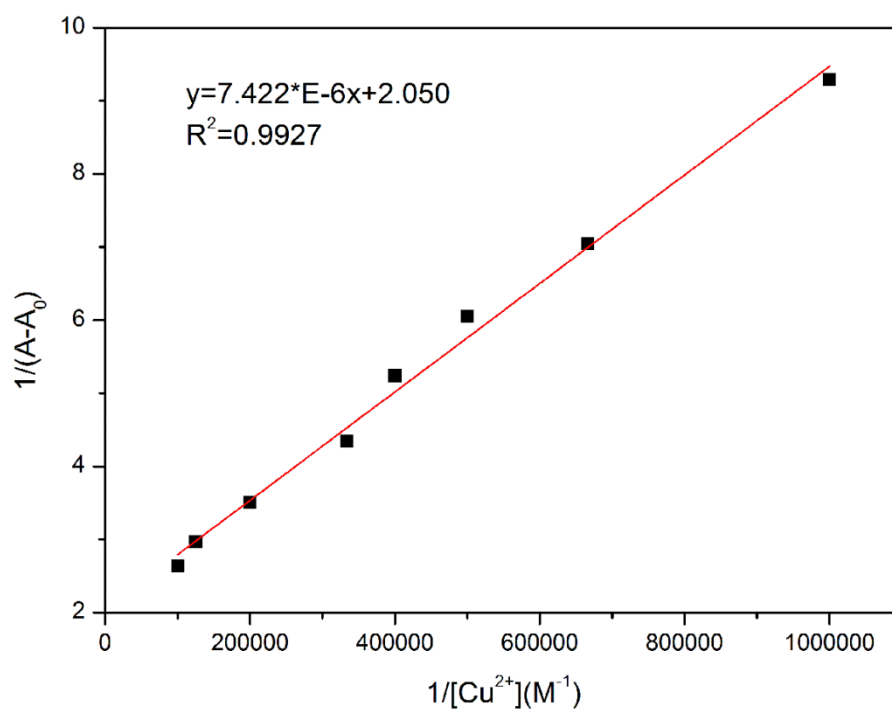

**Fig. S9** Benesi-Hildebrand plot (absorbance at 561 nm) of P(HEA-co-RhBBA) with  $Cu^{2+}$ .

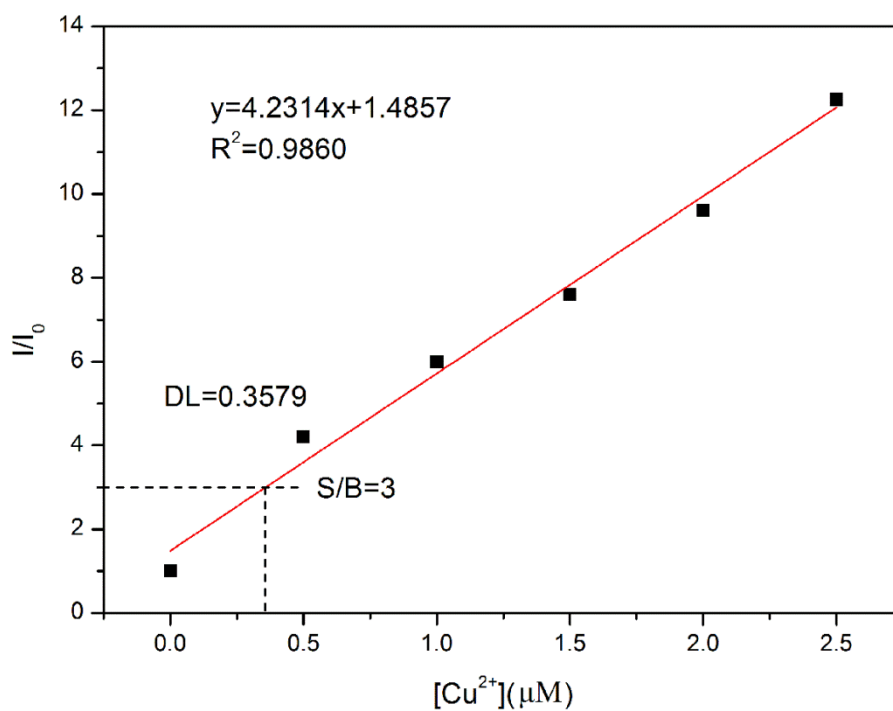

**Fig. S10** Determination of the detection limit based on change in the ratio (absorbance at 561 nm) of P(HEA-co-RhBBA) (10  $\mu M$  RhBBA) with  $Cu^{2+}$ .

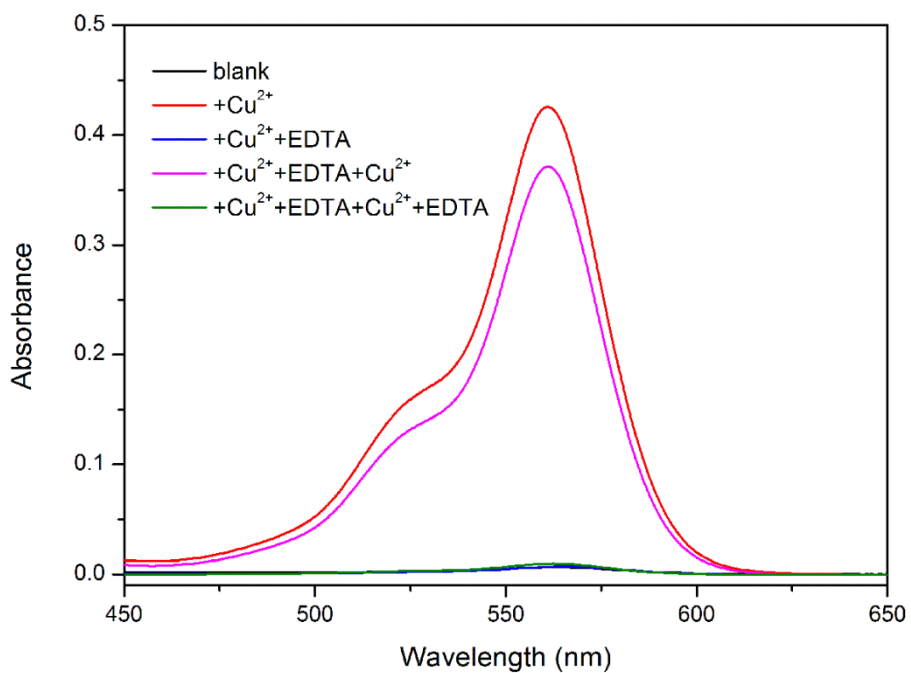

**Fig. S11** UV-vis absorption spectra of P(HEA-co-RhBBA) in aqueous solution (10  $\mu\text{M}$  RhBBA) upon alternate addition of 2 equiv. of  $\text{Cu}^{2+}$  and 2 equiv. of EDTA ions.

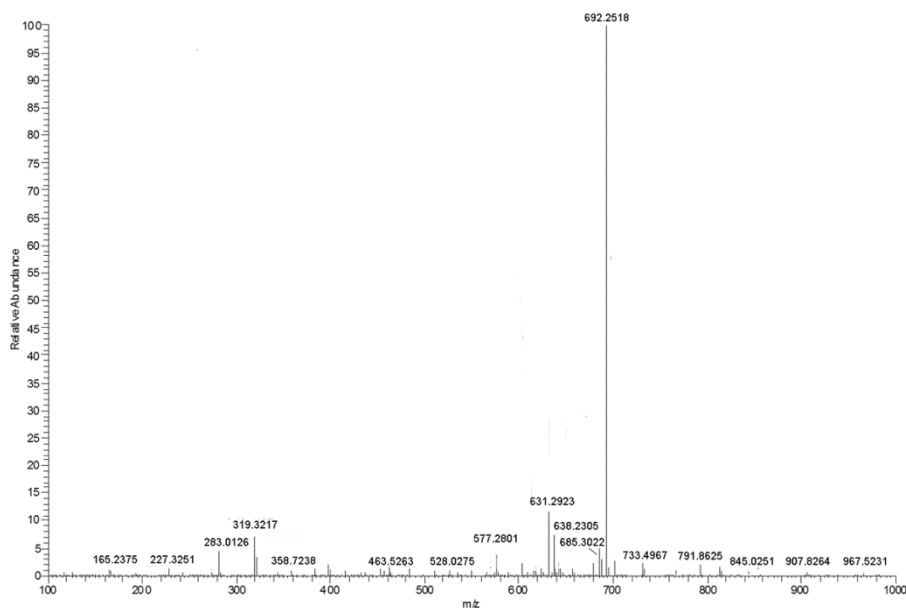

**Fig. S12** HRMS of RhBBA- $\text{Cu}^{2+}$ .

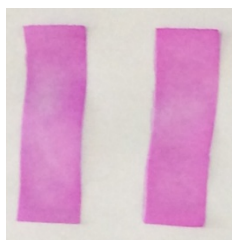

**Fig. S13** Colorimetric detection of  $\text{Cu}^{2+}$  ions by test strips after being immersed into different  $\text{Cu}^{2+}$  aqueous solutions ( $10^{-4}$  M) (left: tap water; right: river water).
